# Supplementary material for: Reconstructing the Rasch-Built Myotonic Dystrophy Type 1 Activity and Participation Scale
Source: PLoS One. 2015 Oct 20;10(10):e0139944. doi: 10.1371/journal.pone.0139944 (PMC4618741; doi:10.1371/journal.pone.0139944)
Supplement: S1 Fig — For further instructions to translate the obtained ordinal scores to an interval (Logits) scores, please contact the authors. (PDF) [file pone.0139944.s001.pdf]

# INSTRUCTIONS

to complete the DM1-ACTIV<sup>C©</sup>

# DM1-ACTIV<sup>C©</sup>

## General aspects

- This 25 item questionnaire covers a wide range of daily and social activities and represents the preliminary 146 items based on the WHO-ICF classification of activities and participation from which it was derived.
- The DM1-ACTIV<sup>C©</sup> captures personal ability to execute a task where the patient is requested to determine whether he/she is able to complete such a task independently.

|    |                                          | Impossible to perform    | Able to perform, but<br>with difficulty | Able to perform, without<br>difficulty |
|----|------------------------------------------|--------------------------|-----------------------------------------|----------------------------------------|
|    | Item                                     | (0)                      | (1)                                     | (2)                                    |
|    | Are you able to...                       |                          |                                         |                                        |
| 1  | eat soup?                                | <input type="checkbox"/> | <input type="checkbox"/>                | <input type="checkbox"/>               |
| 2  | visit family or friends?                 | <input type="checkbox"/> | <input type="checkbox"/>                | <input type="checkbox"/>               |
| 3  | care for your hair and body?             | <input type="checkbox"/> | <input type="checkbox"/>                | <input type="checkbox"/>               |
| 4  | dress your lower body?                   | <input type="checkbox"/> | <input type="checkbox"/>                | <input type="checkbox"/>               |
| 5  | wash your upper body?                    | <input type="checkbox"/> | <input type="checkbox"/>                | <input type="checkbox"/>               |
| 6  | take a shower?                           | <input type="checkbox"/> | <input type="checkbox"/>                | <input type="checkbox"/>               |
| 7  | wash your lower body?                    | <input type="checkbox"/> | <input type="checkbox"/>                | <input type="checkbox"/>               |
| 8  | get out of bed?                          | <input type="checkbox"/> | <input type="checkbox"/>                | <input type="checkbox"/>               |
| 9  | move a chair?                            | <input type="checkbox"/> | <input type="checkbox"/>                | <input type="checkbox"/>               |
| 10 | do the dusting/cleaning?                 | <input type="checkbox"/> | <input type="checkbox"/>                | <input type="checkbox"/>               |
| 11 | do the shopping?                         | <input type="checkbox"/> | <input type="checkbox"/>                | <input type="checkbox"/>               |
| 12 | tie the laces of your shoes?             | <input type="checkbox"/> | <input type="checkbox"/>                | <input type="checkbox"/>               |
| 13 | catch an object (e.g. a ball)?           | <input type="checkbox"/> | <input type="checkbox"/>                | <input type="checkbox"/>               |
| 14 | use dustpan and brush?                   | <input type="checkbox"/> | <input type="checkbox"/>                | <input type="checkbox"/>               |
| 15 | empty dustbin?                           | <input type="checkbox"/> | <input type="checkbox"/>                | <input type="checkbox"/>               |
| 16 | make up your bed?                        | <input type="checkbox"/> | <input type="checkbox"/>                | <input type="checkbox"/>               |
| 17 | vacuum clean?                            | <input type="checkbox"/> | <input type="checkbox"/>                | <input type="checkbox"/>               |
| 18 | serve coffee/tea on a tray?              | <input type="checkbox"/> | <input type="checkbox"/>                | <input type="checkbox"/>               |
| 19 | dance?                                   | <input type="checkbox"/> | <input type="checkbox"/>                | <input type="checkbox"/>               |
| 20 | stand up from squatting position?        | <input type="checkbox"/> | <input type="checkbox"/>                | <input type="checkbox"/>               |
| 21 | stand on one leg?                        | <input type="checkbox"/> | <input type="checkbox"/>                | <input type="checkbox"/>               |
| 22 | walk uphill?                             | <input type="checkbox"/> | <input type="checkbox"/>                | <input type="checkbox"/>               |
| 23 | walk 3 flights of stairs?                | <input type="checkbox"/> | <input type="checkbox"/>                | <input type="checkbox"/>               |
| 24 | carry and put down heavy object (10 kg)? | <input type="checkbox"/> | <input type="checkbox"/>                | <input type="checkbox"/>               |
| 25 | run?                                     | <input type="checkbox"/> | <input type="checkbox"/>                | <input type="checkbox"/>               |

# DM1-ACTIV<sup>C©</sup>

## General aspects

- Patients should complete the questionnaire after having received written and verbal instructions.
- Make sure that the patient is able to complete the questionnaire in a comfortable and quiet room.
- The patient should be comfortably sitting.
- Encourage the patient to complete the questions by themselves. However, a partner, relative or friend may be of assistance if the patient is unsure or has communication problems.
- It takes approximately 3 minutes to complete the questionnaire.

# DM1-ACTIV<sup>©</sup>

## Instructions-I

- Make sure that the answers given are due to the impact of myotonic dystrophy type I, rather than another concomitant disease (e.g. arthritis).
- Ask the patient to rate the tasks as either “Impossible to perform”, “Able to perform, but with difficulty” or “Able to perform, without difficulty”.
- If it is the first time for the patient completing the DM1-ACTIV<sup>©</sup>, go through each question with the patient and ensure the patient that the interpretation of each question is left to his/her best personal judgement rather than a fixed way to interpret each question.

# DM1-ACTIV<sup>©</sup>

## Instructions-II

- Instruct the patient that there are no right or wrong answers. Encourage the patient to choose the response that best describes his/her situation.
- A partner, family or a carer may help in interpreting the tasks in the way that reflects the situation of the patient as accurate as possible.
- For example: “Able to do the shopping?” The patient may experience difficulties at various levels, which may lead to problems executing such a task. This may also differ from patient to patient.
- Problems executing this task may be due to physical impairment such as weakness leading to mobility problems, transportation limitations, financial handling problems, executive cognitive dysfunctions.

# DM1-ACTIV<sup>C©</sup>

## Instructions-III

- In case of any doubt or addressing a task that is not relevant to the patient (e.g. “I never do vacuum cleaning”), the patient is requested to choose an answer to the best of his/her personal judgment of being able or not to perform such a task, with or without difficulty.
- If still unsure and if possible, you may observe the patient performing the task, or miming the task.
- When using a special device (for example adapted cutlery (spoon), special cooking utensils, cane, crutch, or walker) to complete a task, the patient is requested to score “Able to perform, but with difficulty”.
- However, if the patient is not able to execute a task despite using special devices, the patient should score “Impossible to perform”.

# DM1-ACTIV<sup>C©</sup>

## Instructions-IV

- When some assistance is needed (for example support by a caregiver), to complete a task, the patient is requested to score “Able to perform, but with difficulty”.
- However, if the patient is not able to contribute in completing a task, the patient should score “Impossible to perform”.
